# Supplementary material
Source: PubMed Central journal article supplement (PMC2519011)
Supplement: NIHMS61949-supplement-si20070209_123.pdf [file NIHMS61949-supplement-si20070209_123.pdf]

## Supplemental Information

# Polarizable Empirical Force Field for Aromatic Compounds Based on the Classical Drude Oscillator

*Pedro E. M. Lopes<sup>1</sup>, Guillaume Lamoureux<sup>2</sup>, Benoit Roux<sup>2</sup> and*

*Alexander D. MacKerell, Jr.<sup>1,\*</sup>*

Table S1) Geometric data for benzene and toluene. In each row the upper values are from the polarizable model and the lower values are the target data.

|                                                                                                                            | Benzene (drude)               | Toluene (drude)               |
|----------------------------------------------------------------------------------------------------------------------------|-------------------------------|-------------------------------|
| C(arom)-C(arom)                                                                                                            | 1.396<br>(1.392) <sup>a</sup> | 1.403<br>(1.380) <sup>b</sup> |
| C(arom)-C(met)                                                                                                             | -                             | 1.498<br>(1.490) <sup>b</sup> |
| C(arom)-H                                                                                                                  | 1.080<br>(1.080) <sup>a</sup> | 1.077<br>(0.945) <sup>b</sup> |
| C(methyl)-H                                                                                                                | -                             | 1.111<br>(0.969) <sup>b</sup> |
| C(arom)- C(arom)- C(arom)                                                                                                  | 120.0                         | 120.0<br>(120.0)              |
| C(arom)- C(arom)- C(met)                                                                                                   | -                             | 120.0<br>(120.6)              |
| a) From Gauss and Stanton, <i>J. Phys. Chem. A</i> <b>2000</b> , <i>104</i> , 2865.<br>b) Average values from CSD searches |                               |                               |

Table S2) Vibrational spectra for benzene and toluene

| Benzene |         |     |         |    |                                                        |         |     |         |    |              |                   |
|---------|---------|-----|---------|----|--------------------------------------------------------|---------|-----|---------|----|--------------|-------------------|
| Drude   |         |     |         |    | MP2/6-31G*                                             |         |     |         |    | Experimental |                   |
| Freq.   | PED     | %   | PED     | %  | Freq.                                                  | PED     | %   | PED     | %  | Freq.        | Assign            |
| 417.1   | asytor  | 92  |         |    | 374.8                                                  | asytor  | 88  |         |    | 410          | Ring Deform       |
| 417.1   | asytor' | 92  |         |    | 374.8                                                  | asytor' | 88  |         |    | 410          | Ring Deform       |
| 626.3   | puck    | 85  | wagCH   | 15 | 477.3                                                  | puck    | 100 |         |    | 606          | Ring Deform       |
| 663.1   | asydef  | 60  | sCC     | 20 | 584.8                                                  | asydef' | 67  | asydef  | 25 | 673          | CH bend           |
| 663.1   | asydef' | 60  | sCC     | 20 | 584.9                                                  | asydef  | 67  | asydef' | 25 |              |                   |
| 701.0   | wagCH   | 100 |         |    | 647.2                                                  | wagCH   | 100 |         |    | 703          | Ring Deform       |
| 854.9   | wagCH   | 100 |         |    | 797                                                    | wagCH   | 100 |         |    | 849          | CH bend           |
| 854.9   | wagCH   | 100 |         |    | 797                                                    | wagCH   | 100 |         |    |              |                   |
| 928.4   | tridef  | 100 |         |    | 844.5                                                  | wagCH   | 88  |         |    | 975          | CH bend           |
| 929.9   | sCC     | 100 |         |    | 844.5                                                  | wagCH   | 88  |         |    | 992          | Ring str          |
| 948.6   | sCC     | 80  | rockCH  | 20 | 848.4                                                  | wagCH   | 100 |         |    |              |                   |
| 948.6   | sCC     | 80  | rockCH  | 20 | 964.9                                                  | tridef  | 100 |         |    | 995          | CH bend           |
| 997.8   | wagCH   | 92  |         |    | 969.1                                                  | sCC     | 99  |         |    | 1010         | Ring Deform       |
| 997.8   | wagCH   | 92  |         |    | 1021.9                                                 | sCC     | 67  | rockCH  | 33 | 1038         | CH bend           |
| 1012.0  | wagCH   | 85  | Puck    | 15 | 1021.9                                                 | sCC     | 67  | rockCH  | 33 |              |                   |
| 1169.8  | rockCH  | 62  | sCC     | 31 | 1140.8                                                 | rockCH  | 92  |         |    | 1150         | CH bend           |
| 1169.8  | rockCH  | 62  | sCC     | 31 | 1160.1                                                 | rockCH  | 77  | sCC     | 23 | 1178         | CH bend           |
| 1232.7  | rockCH  | 80  | sCC     | 20 | 1160.1                                                 | rockCH  | 77  | sCC     | 23 |              |                   |
| 1389.4  | rockCH  | 100 |         |    | 1312.2                                                 | rockCH  | 100 |         |    | 1310         | Ring str          |
| 1451.3  | sCC     | 80  | rockCH  | 20 | 1380.7                                                 | sCC     | 92  |         |    | 1326         | CH bend           |
| 1451.9  | rockCH  | 80  | sCC     | 20 | 1451.8                                                 | rockCH  | 67  | sCC     | 33 | 1486         | Ring str + deform |
| 1451.9  | rockCH  | 80  | sCC     | 20 | 1451.8                                                 | rockCH  | 67  | sCC     | 33 |              |                   |
| 1511.1  | sCC     | 49  | rockCH  | 38 | 1576.5                                                 | sCC     | 70  | rockCH  | 20 | 1596         | Ring str          |
| 1511.2  | sCC     | 49  | rockCH  | 38 | 1576.5                                                 | sCC     | 70  | rockCH  | 20 | 1596         | Ring str          |
| 3053.2  | sCH     | 100 |         |    | 3033.7                                                 | sCH     | 100 |         |    | 3047         | CH str            |
| 3053.2  | sCH     | 100 |         |    | 3042.9                                                 | sCH     | 100 |         |    |              |                   |
| 3057.0  | sCH     | 100 |         |    | 3042.9                                                 | sCH     | 100 |         |    | 3062         | CH str            |
| 3057.0  | sCH     | 100 |         |    | 3056.7                                                 | sCH     | 99  |         |    | 3063         | CH str            |
| 3057.1  | sCH     | 100 |         |    | 3056.7                                                 | sCH     | 99  |         |    | 3063         | CH str            |
| 3057.3  | sCH     | 100 |         |    | 3065.3                                                 | sCH     | 99  |         |    | 3068         | CH str            |
| Toluene |         |     |         |    |                                                        |         |     |         |    |              |                   |
| Drude   |         |     |         |    | MP2/6-31G* (No experimental data analyzed for toluene) |         |     |         |    |              |                   |
| 22.8    | tMethyl | 100 |         |    | 56                                                     | tMethyl | 100 |         |    |              |                   |
| 215.9   | wagCH   | 86  |         |    | 195.1                                                  | wagCH   | 82  |         |    |              |                   |
| 347.2   | rCCm    | 85  |         |    | 324.9                                                  | rCCm    | 84  |         |    |              |                   |
| 405.7   | asytor  | 62  | asytor' | 29 | 375.9                                                  | asytor  | 59  | asytor' | 29 |              |                   |
| 452.1   | asytor' | 57  | wagCH   | 24 | 425.8                                                  | asytor' | 54  | wagCH   | 27 |              |                   |
| 506.7   | asydef' | 45  | bCMet   | 39 | 474.6                                                  | puck    | 98  |         |    |              |                   |
| 623.6   | puck    | 81  | wagCH   | 17 | 498.7                                                  | asydef' | 76  | bCMet   | 15 |              |                   |
| 678.3   | asydef  | 82  | sCC     | 17 | 599.9                                                  | asydef  | 88  |         |    |              |                   |

|        |         |     |         |    |        |         |     |         |    |  |  |
|--------|---------|-----|---------|----|--------|---------|-----|---------|----|--|--|
| 763.2  | wagCH   | 86  |         |    | 682.5  | wagCH   | 96  |         |    |  |  |
| 766.9  | asydef  | 28  | sCC     | 25 | 763.9  | sCC     | 33  | bCMet   | 31 |  |  |
| 880.9  | wagCH   | 100 |         |    | 787.9  | wagCH   | 100 |         |    |  |  |
| 946.5  | tridef  | 53  | sCC     | 37 | 811.1  | wagCH   | 95  |         |    |  |  |
| 959.5  | wagCH   | 79  |         |    | 833.8  | wagCH   | 89  | asytor  | 16 |  |  |
| 974.4  | sCC     | 81  |         |    | 837.3  | wagCH   | 96  |         |    |  |  |
| 990.6  | sCC     | 48  | MeRock' | 36 | 965.9  | tridef  | 65  | sCC     | 34 |  |  |
| 1011.3 | wagCH   | 81  |         |    | 970.6  | MeRock' | 69  | sCC     | 25 |  |  |
| 1030.8 | wagCH   | 92  |         |    | 1009.6 | sCC     | 71  | rockCH  | 21 |  |  |
| 1041.2 | MeRock' | 42  | sCC     | 31 | 1021.6 | MeRock  | 86  |         |    |  |  |
| 1054   | MeRock  | 64  | wagCH   | 17 | 1073.8 | sCC     | 44  | rockCH  | 42 |  |  |
| 1118.1 | sCC     | 46  | bCMet   | 24 | 1145.9 | rockCH  | 87  |         |    |  |  |
| 1177.7 | rockCH  | 54  | sCC     | 26 | 1165   | rockCH  | 77  | sCC     | 24 |  |  |
| 1207.1 | rockCH  | 67  | sCC     | 29 | 1192.6 | bCMet   | 42  | sCC     | 24 |  |  |
| 1346   | rockCH  | 64  | sCC     | 19 | 1291.2 | rockCH  | 87  |         |    |  |  |
| 1404.9 | rockCH  | 35  | MeASde  | 30 | 1380   | sCC     | 87  |         |    |  |  |
| 1424.1 | MeASde' | 42  | MeSymDe | 25 | 1385   | MeSymDe | 96  |         |    |  |  |
| 1431.8 | rockCH  | 58  | sCC     | 26 | 1420.1 | rockCH  | 50  | sCC     | 38 |  |  |
| 1444.3 | sCC     | 51  | MeASde  | 20 | 1460.8 | MeASde' | 70  | MeASde  | 23 |  |  |
| 1451.3 | rockCH  | 34  | MeSymDe | 25 | 1470   | rockCH  | 58  | sCC     | 36 |  |  |
| 1469.4 | rockCH  | 49  | sCC     | 27 | 1470.9 | MeASde  | 63  | MeASde' | 21 |  |  |
| 1484.8 | sCC     | 45  | rockCH  | 39 | 1567.6 | sCC     | 70  | rockCH  | 16 |  |  |
| 1525.7 | sCC     | 31  | rockCH  | 27 | 1588.5 | sCC     | 68  | rockCH  | 19 |  |  |
| 2845.4 | sCHmet  | 100 |         |    | 2922.8 | sCHmet  | 100 |         |    |  |  |
| 2915.3 | sCHmet  | 100 |         |    | 2998.3 | sCHmet  | 100 |         |    |  |  |
| 2915.9 | sCHmet  | 100 |         |    | 3013.8 | sCHmet  | 99  |         |    |  |  |
| 3052.7 | sCHar   | 100 |         |    | 3027   | sCHar   | 100 |         |    |  |  |
| 3054   | sCHar   | 100 |         |    | 3028.4 | sCHar   | 98  |         |    |  |  |
| 3055.7 | sCHar   | 100 |         |    | 3041.7 | sCHar   | 100 |         |    |  |  |
| 3056.6 | sCHar   | 100 |         |    | 3049.4 | sCHar   | 99  |         |    |  |  |
| 3058   | sCHar   | 100 |         |    | 3061   | sCHar   | 99  |         |    |  |  |

Experimental data from reference 86 and PED as defined in reference 64.

Table S3) Final force field parameters for the presented models of benzene and toluene

| Benzene       |                                                         |                  |                      |
|---------------|---------------------------------------------------------|------------------|----------------------|
|               | Charges                                                 |                  | Polarizabilities     |
| C             | -0.080                                                  |                  | -1.376               |
| H             | 0.080                                                   |                  | 0.000                |
| Toluene       |                                                         |                  |                      |
|               | Charges                                                 |                  | Polarizabilities     |
| CG            | 0.036                                                   |                  | -0.875               |
| CD1           | -0.088                                                  |                  | -1.214               |
| HD1           | 0.099                                                   |                  | 0.000                |
| CD2           | -0.088                                                  |                  | -1.214               |
| HD2           | 0.099                                                   |                  | 0.000                |
| CE1           | -0.119                                                  |                  | -1.376               |
| HE1           | 0.098                                                   |                  | 0.000                |
| CE2           | -0.119                                                  |                  | -1.376               |
| HE2           | 0.098                                                   |                  | 0.000                |
| CZ            | -0.125                                                  |                  | -1.376               |
| HZ            | 0.098                                                   |                  | 0.000                |
| CT            | -0.226                                                  |                  | -1.473               |
| H11           | 0.079                                                   |                  | 0.000                |
| H12           | 0.079                                                   |                  | 0.000                |
| H13           | 0.079                                                   |                  | 0.000                |
| LJ parameters |                                                         |                  |                      |
|               | Epsilon                                                 |                  | Rmin/2               |
| CA            | -0.0680                                                 |                  | 2.0000               |
| HP            | -0.0430                                                 |                  | 1.3000               |
| CT3           | -0.0780                                                 |                  | 2.0400               |
| HA3           | -0.0240                                                 |                  | 1.3400               |
| Bonds         |                                                         |                  |                      |
|               | $K_b$ (kcal·mol <sup>-1</sup> ·Å <sup>-2</sup> )        |                  | $b_0$ (Å)            |
| CA CA         | 305.000                                                 |                  | 1.3750               |
| HP CA         | 340.000                                                 |                  | 1.0800               |
| CT3 CA        | 230.000                                                 |                  | 1.4900               |
| CT3 HA3       | 322.000                                                 |                  | 1.1110               |
| Bonds         |                                                         |                  |                      |
|               | $K_\theta$ (kcal·mol <sup>-1</sup> ·rad <sup>-2</sup> ) |                  | $\theta_0$ (degrees) |
| CA CA CA      | 40.000                                                  |                  | 120.00               |
| HP CA CA      | 30.000                                                  |                  | 120.00               |
| CT3 CA CA     | 45.800                                                  |                  | 122.30               |
| HA3 CT3 CA    | 49.300                                                  |                  | 107.50               |
| HA3 CT3 HA3   | 35.500                                                  |                  | 108.40               |
| Urey-Bradley  |                                                         |                  |                      |
|               | $K_{ub}$ (kcal·mol <sup>-1</sup> ·rad <sup>-2</sup> )   |                  | $S_0$ (Å)            |
| CA CA CA      | 35.00                                                   |                  | 2.41620              |
| HP CA CA      | 22.00                                                   |                  | 2.15250              |
| HA3 CT3 HA3   | 5.40                                                    |                  | 1.80200              |
| Dihedrals     |                                                         |                  |                      |
|               | $K_{chi}$ (kcal·mol <sup>-1</sup> )                     | n (multiplicity) | $\delta$ (degrees)   |
| CA CA CA CA   | 2.8000                                                  | 2                | 180.00               |
| HP CA CA CA   | 4.2000                                                  | 2                | 180.00               |
| HP CA CA HP   | 2.4000                                                  | 2                | 180.00               |
| CT3 CA CA CA  | 3.1000                                                  | 2                | 180.00               |
| HP CA CA CT3  | 4.2000                                                  | 2                | 180.00               |
| X CT3 CA X    | 0.0000                                                  | 6                | 0.00                 |

Table S4) Absolute minimum interaction energies and distances for the interactions of benzene with Helium and Neon and the rare gases.

| Benzene + Helium |           |         |         |           |        |        |
|------------------|-----------|---------|---------|-----------|--------|--------|
| Geom             | Energy    |         |         | Distance  |        |        |
|                  | Ab initio | Drude   | C22     | Ab initio | Drude  | C22    |
| 1                | -0.1692   | -0.2088 | -0.2082 | 3.5929    | 3.2400 | 3.2400 |
| 2                | -0.1161   | -0.1036 | -0.0946 | 2.7680    | 2.6400 | 2.6800 |
| 3                | -0.1817   | -0.2183 | -0.2180 | 3.5404    | 3.2300 | 3.2300 |
| 4                | -0.1591   | -0.1684 | -0.1568 | 3.5396    | 3.3900 | 3.4200 |
| 5                | -0.1502   | -0.1874 | -0.1861 | 3.5991    | 3.1800 | 3.1900 |
| 6                | -0.3515   | -0.2690 | -0.2687 | 3.0592    | 3.1500 | 3.1500 |
| Benzene + Neon   |           |         |         |           |        |        |
| Geom             | Energy    |         |         | Distance  |        |        |
|                  | Ab initio | Drude   | C22     | Ab initio | Drude  | C22    |
| 1                | -0.6657   | -0.4317 | -0.4245 | 3.3619    | 3.2800 | 3.2800 |
| 2                | -0.6752   | -0.4468 | -0.4387 | 3.3658    | 3.2000 | 3.2000 |
| 3                | -0.7438   | -0.3380 | -0.3156 | 3.4529    | 3.4400 | 3.4700 |
| 4                | -0.6579   | -0.3872 | -0.3805 | 3.2990    | 3.2300 | 3.2300 |
| 5                | -0.8064   | -0.5495 | -0.5395 | 3.2059    | 3.2000 | 3.2000 |

Interaction orientations are in Figure 1 of the main text.
